# Supplementary material for: Inequality and Support for Government Responses to COVID-19
Source: Research Square preprint supplement (doi:10.21203/rs.3.rs-258076/v1), 2021-02-26
Supplement: Supplementary file 1 [file a610bad83443d01a6c502462.docx]

# Appendix A: Additional Tables

## Table A.1. OLS regressions of belief that government’s policy to the COVID-19 pandemic was effective

| Explanatory variables | (1) | (2) | (3) | (4) | (5) | (6) | (7) | (8) |
| --- | --- | --- | --- | --- | --- | --- | --- | --- |
| Overall government in response to the pandemic | Shutting down schools | Shutting down public transport | Shutting down non-essential businesses | Limiting mobility outside home | Forbidding mass gatherings | Introducing fines for citizens that don't respect public safety measures | Requiring masks to be worn outside by everyone |
| Poorest quintile | -0.1783*** | 0.0091 | -0.1153** | -0.0402 | -0.1049** | -0.1927*** | -0.0768 | -0.0800 |
|  | (0.0450) | (0.0480) | (0.0481) | (0.0474) | (0.0473) | (0.0455) | (0.0518) | (0.0498) |
| Second poorest quintile | -0.1324*** | -0.0323 | -0.1464*** | -0.0639 | -0.0806* | -0.1583*** | -0.0063 | -0.0797 |
|  | (0.0450) | (0.0477) | (0.0485) | (0.0475) | (0.0468) | (0.0446) | (0.0503) | (0.0493) |
| Middle quintile | -0.1450*** | 0.0566 | -0.0367 | 0.0420 | 0.0335 | -0.0633 | 0.0407 | 0.0650 |
|  | (0.0447) | (0.0449) | (0.0452) | (0.0449) | (0.0443) | (0.0416) | (0.0477) | (0.0470) |
| Second richest quintile | -0.0895** | 0.0290 | 0.0099 | 0.0485 | 0.0224 | -0.0377 | 0.0353 | -0.0592 |
|  | (0.0438) | (0.0440) | (0.0435) | (0.0434) | (0.0439) | (0.0408) | (0.0466) | (0.0458) |
| Control variables | Yes | Yes | Yes | Yes | Yes | Yes | Yes | Yes |
| Constant | 3.7012*** | 3.8575*** | 3.9584*** | 3.7566*** | 3.7136*** | 4.1796*** | 3.4475*** | 3.8065*** |
|  | (0.0674) | (0.0694) | (0.0715) | (0.0703) | (0.0693) | (0.0682) | (0.0766) | (0.0723) |
| Observations | 5,950 | 5,950 | 5,950 | 5,950 | 5,950 | 5,950 | 5,950 | 5,950 |
| R-squared | 0.168 | 0.064 | 0.077 | 0.090 | 0.051 | 0.032 | 0.039 | 0.163 |
| Note: The control variables include age groups, gender, urban dummy, country dummies, and COVID-19 infection rates. The richest income quintile is the reference group. Robust standard errors in parentheses.  *** p<0.01, ** p<0.05, * p<0.1 | | | | | | | | |

## Table A.2: OLS regressions with interactions

|  | (1) | (2) | (3) | (4) |
| --- | --- | --- | --- | --- |
| Explanatory variables | Believe in the approach of the government in response to the pandemic | Index of the variables 'believe to different policies' | Believe in the approach of the government in response to the pandemic | Index of the variables 'believe to different policies' |
| Poorest quintile | 0.0967 | 0.3304 | 0.4094 | 0.1540 |
|  | (0.2942) | (0.3230) | (0.5058) | (0.4649) |
| Second poorest quintile | 0.8628*** | 0.3894 | 1.6277*** | 0.9897** |
|  | (0.2958) | (0.3160) | (0.5138) | (0.4613) |
| Middle quintile | 0.7084** | 0.9665*** | 1.3697*** | 1.0364** |
|  | (0.2990) | (0.3115) | (0.5123) | (0.4408) |
| Second richest quintile | 0.4210 | 0.0459 | 0.7137 | 0.1376 |
|  | (0.2945) | (0.3053) | (0.4964) | (0.4182) |
| Richest quintile | *Reference* |  |  |  |
| Poorest quintile * Gini index | -0.0080 | -0.0125 | -0.0163 | -0.0070 |
|  | (0.0084) | (0.0093) | (0.0140) | (0.0130) |
| Second poorest quintile * Gini index | -0.0291*** | -0.0141 | -0.0490*** | -0.0301** |
|  | (0.0084) | (0.0091) | (0.0142) | (0.0129) |
| Middle quintile* Gini index | -0.0250*** | -0.0278*** | -0.0422*** | -0.0283** |
|  | (0.0086) | (0.0090) | (0.0142) | (0.0123) |
| Second richest quintile * Gini index | -0.0149* | -0.0011 | -0.0223 | -0.0036 |
|  | (0.0083) | (0.0088) | (0.0137) | (0.0116) |
| Control variables | Yes | Yes | Yes | Yes |
| Constant | 3.7689*** | 0.0248 | 3.8581*** | 0.0644 |
|  | (0.0694) | (0.0665) | (0.0848) | (0.0788) |
| Observations | 5,950 | 5,950 | 5,950 | 5,950 |
| R-squared | 0.170 | 0.063 | 0.171 | 0.062 |
| Note: The control variables include age groups, gender, urban dummy, country dummies, and COVID-19 infection rates. The richest income quintile is the reference group. Columns (1) and (2) use the Gini index from the Solt database, and Columns (3) and (4) use the Gini index from the World Bank World Development Indicators database. Robust standard errors in parentheses | | | | |
| *** p<0.01, ** p<0.05, * p<0.1 |  |  |  |  |

## Table A.3. Distribution of respondents by the level of degree to the responses to the COVID-19

|  | How effective do you believe each of these measures is in reducing the spread of the epidemic? | | | | | | | |
| --- | --- | --- | --- | --- | --- | --- | --- | --- |
| Shutting down schools | Shutting down public transport | Shutting down non-essential businesses | Limiting mobility outside home | Forbidding mass gatherings | Introducing fines for citizens that don't respect public safety measures | Requiring masks to be worn outside by everyone | Agree with the approach of the government in response to the pandemic |
| Not effective at all | 4.5 | 5.7 | 4.9 | 4.4 | 3.7 | 6.6 | 7.1 | 6.1 |
| Slightly effective | 10.8 | 9.6 | 10.0 | 8.8 | 4.6 | 9.0 | 9.6 | 9.2 |
| Moderately effective | 18.4 | 21.3 | 22.4 | 20.1 | 11.8 | 20.6 | 18.6 | 20.5 |
| Very effective | 33.8 | 32.5 | 31.9 | 33.8 | 26.0 | 29.4 | 26.7 | 32.7 |
| Extremely effective | 32.6 | 31.0 | 30.8 | 33.0 | 53.9 | 34.5 | 38.0 | 31.6 |
| Total | 100.0 | 100.0 | 100.0 | 100.0 | 100.0 | 100.0 | 100.0 | 100.0 |

## Table A.4. Mean of outcomes and inequality variables

| Variables | China | Italy | Japan | South Korea | The UK | The US | All sample |
| --- | --- | --- | --- | --- | --- | --- | --- |
| Believe in the government in response to the pandemic | 4.52 | 3.73 | 2.90 | 3.68 | 3.89 | 3.76 | 3.74 |
| Believe in Shutting down schools | 4.00 | 4.11 | 3.42 | 3.68 | 3.51 | 4.01 | 3.79 |
| Believe in Shutting down public transport | 3.94 | 3.97 | 3.62 | 3.09 | 3.77 | 3.97 | 3.73 |
| Believe in Shutting down non-essential businesses | 4.10 | 3.97 | 3.59 | 3.08 | 3.78 | 3.86 | 3.74 |
| Believe in Limiting mobility outside home | 3.99 | 3.99 | 3.79 | 3.36 | 3.88 | 3.87 | 3.82 |
| Believe in Forbidding mass gatherings | 4.23 | 4.40 | 4.00 | 4.23 | 4.24 | 4.20 | 4.22 |
| Believe in Introducing fines for citizens that don't respect public safety measures | 3.97 | 4.00 | 3.44 | 3.90 | 3.67 | 3.59 | 3.76 |
| Believe in Requiring masks to be worn outside by everyone | 4.34 | 4.04 | 3.55 | 4.14 | 2.88 | 3.80 | 3.79 |
| Gini index (in percent) (Solt database) | 40.9 | 33.7 | 25.6 | 32.7 | 33.3 | 38.2 | 34.1 |
| Gini index (in percent) (World Development Indicators) | 38.5 | 35.9 | 32.9 | 31.6 | 34.8 | 41.4 | 35.9 |
| Ratio 90th/10th | 10.85 | 14.05 | 9.10 | 9.15 | 9.57 | 17.94 | 11.86 |
| Ratio 80th/20th | 6.97 | 7.02 | 5.34 | 5.34 | 5.93 | 9.18 | 6.66 |
| The rate of COVID-19 cases per 1000 people | 0.05 | 1.73 | 0.13 | 0.21 | 1.53 | 7.28 | 1.88 |

## Table A.5. Regression of variable ‘believe in the government in response to the pandemic’ for different countries

| Explanatory variables | China | Italy | Japan | Korea | UK | US |
| --- | --- | --- | --- | --- | --- | --- |
| (1) | (2) | (3) | (4) | (5) | (6) |
| Poorest quintile | -0.1545* | -0.2531** | -0.1437 | -0.3542** | -0.0550 | -0.1976 |
|  | (0.0834) | (0.1103) | (0.1231) | (0.1427) | (0.1046) | (0.1224) |
| Second poorest quintile | -0.2744*** | -0.0862 | -0.0275 | 0.0039 | -0.0655 | -0.3441*** |
|  | (0.0772) | (0.1116) | (0.1195) | (0.1359) | (0.1034) | (0.1279) |
| Middle quintile | -0.3432*** | -0.1405 | 0.0041 | -0.0143 | -0.1717 | -0.2848** |
|  | (0.0882) | (0.1083) | (0.1183) | (0.1280) | (0.1095) | (0.1232) |
| Second richest quintile | -0.1053 | 0.0122 | -0.0906 | -0.0448 | -0.0885 | -0.1967* |
|  | (0.0661) | (0.1132) | (0.1201) | (0.1259) | (0.1014) | (0.1130) |
| Control variables | Yes | Yes | Yes | Yes | Yes | Yes |
| Constant | 4.7118*** | 3.1364*** | 3.5674*** | 4.1371*** | 3.7677*** | 3.4783*** |
|  | (0.0842) | (0.1452) | (0.1289) | (0.1696) | (0.1495) | (0.1568) |
| Observations | 994 | 982 | 919 | 1,021 | 995 | 1,039 |
| R-squared | 0.035 | 0.024 | 0.031 | 0.038 | 0.056 | 0.038 |
| Note: The control variables include age groups, gender, urban dummy, country dummies, and COVID-19 infection rates. The richest income quintile is the reference group. Robust standard errors in parentheses.  *** p<0.01, ** p<0.05, * p<0.1 | | | | | | |

## Table A.6. OLS regression of mediating variables on income quintiles

| Explanatory variables | Dependent variables | | | | | | | | |
| --- | --- | --- | --- | --- | --- | --- | --- | --- | --- |
| Temporary loss of job | Permanent loss of job | Expense change | Saving change | Enjoying more free time | Less pollution | Boredom | Trouble sleeping | Increased conflicts with other people |
| The rate of COVID-19 | 0.0005 | 0.0027** | -0.0050 | -0.0035 | 0.0023 | -0.0041*** | 0.0027* | 0.0029** | -0.0001 |
|  | (0.0008) | (0.0013) | (0.0035) | (0.0033) | (0.0015) | (0.0014) | (0.0015) | (0.0014) | (0.0008) |
| Poorest quintile | 0.0441*** | 0.0866*** | 0.0205 | -0.1329*** | -0.0509** | -0.0842*** | -0.0212 | 0.0069 | -0.0057 |
|  | (0.0099) | (0.0178) | (0.0518) | (0.0453) | (0.0198) | (0.0202) | (0.0211) | (0.0181) | (0.0119) |
| Second poorest quintile | 0.0232** | 0.0981*** | -0.0313 | -0.1800*** | -0.0155 | -0.0299 | -0.0299 | 0.0009 | 0.0210* |
|  | (0.0093) | (0.0180) | (0.0514) | (0.0449) | (0.0201) | (0.0204) | (0.0209) | (0.0179) | (0.0126) |
| Middle quintile | 0.0062 | 0.0805*** | -0.0475 | -0.1481*** | -0.0126 | -0.0120 | 0.0174 | -0.0029 | -0.0083 |
|  | (0.0083) | (0.0173) | (0.0501) | (0.0441) | (0.0195) | (0.0198) | (0.0203) | (0.0175) | (0.0115) |
| Second highest quintile | -0.0032 | 0.0445*** | -0.0696 | -0.0340 | -0.0148 | -0.0170 | -0.0125 | -0.0096 | 0.0074 |
|  | (0.0081) | (0.0169) | (0.0492) | (0.0435) | (0.0191) | (0.0195) | (0.0200) | (0.0172) | (0.0116) |
| Richest quintile | *Reference* |  |  |  |  |  |  |  |  |
| Control variables | Yes | Yes | Yes | Yes | Yes | Yes | Yes | Yes | Yes |
| Constant | 0.0736*** | 0.2048*** | 2.6319*** | 2.7517*** | 0.5891*** | 0.4811*** | 0.6891*** | 0.4083*** | 0.1623*** |
|  | (0.0154) | (0.0269) | (0.0756) | (0.0695) | (0.0297) | (0.0302) | (0.0299) | (0.0279) | (0.0196) |
| Observations | 5,950 | 5,950 | 5,950 | 5,950 | 5,950 | 5,950 | 5,950 | 5,950 | 5,950 |
| R-squared | 0.029 | 0.066 | 0.023 | 0.031 | 0.109 | 0.108 | 0.050 | 0.074 | 0.023 |
|  |  |  |  |  |  |  |  |  |  |
| Note: The control variables include age groups, gender, urban dummy, country dummies. Robust standard errors in parentheses  *** p<0.01, ** p<0.05, * p<0.1 | | | | | | | | | |

## Table A.7. OLS regression of 'Believe in the approach of the government in response to the pandemic' on mediating variables

| Explanatory variables | Dependent variable is 'Believe in the approach of the government in response to the pandemic' | | | | | | | | |
| --- | --- | --- | --- | --- | --- | --- | --- | --- | --- |
| Model 1 | Model 2 | Model 3 | Model 4 | Model 5 | Model 6 | Model 7 | Model 8 | Model 9 |
| The rate of COVID-19 | 0.0046 | 0.0050 | 0.0046 | 0.0047 | 0.0042 | 0.0051 | 0.0045 | 0.0047 | 0.0044 |
|  | (0.0035) | (0.0035) | (0.0035) | (0.0035) | (0.0035) | (0.0035) | (0.0035) | (0.0035) | (0.0035) |
| Poorest quintile | -0.1683*** | -0.1625*** | -0.1786*** | -0.1695*** | -0.1713*** | -0.1663*** | -0.1782*** | -0.1779*** | -0.1796*** |
|  | (0.0450) | (0.0452) | (0.0450) | (0.0451) | (0.0450) | (0.0449) | (0.0450) | (0.0450) | (0.0450) |
| Second poorest quintile | -0.1272*** | -0.1145** | -0.1319*** | -0.1205*** | -0.1303*** | -0.1282*** | -0.1322*** | -0.1324*** | -0.1275*** |
|  | (0.0449) | (0.0450) | (0.0450) | (0.0449) | (0.0450) | (0.0449) | (0.0450) | (0.0449) | (0.0450) |
| Middle quintile | -0.1436*** | -0.1303*** | -0.1442*** | -0.1351*** | -0.1432*** | -0.1433*** | -0.1451*** | -0.1451*** | -0.1469*** |
|  | (0.0447) | (0.0446) | (0.0447) | (0.0446) | (0.0446) | (0.0446) | (0.0447) | (0.0447) | (0.0447) |
| Second highest quintile | -0.0902** | -0.0814* | -0.0884** | -0.0872** | -0.0874** | -0.0871** | -0.0894** | -0.0901** | -0.0877** |
|  | (0.0437) | (0.0437) | (0.0438) | (0.0437) | (0.0437) | (0.0436) | (0.0438) | (0.0437) | (0.0437) |
| Richest quintile | Reference |  |  |  |  |  |  |  |  |
| Temporary loss of job | -0.2276*** |  |  |  |  |  |  |  |  |
|  | (0.0696) |  |  |  |  |  |  |  |  |
| Permanent loss of job |  | -0.1827*** |  |  |  |  |  |  |  |
|  |  | (0.0335) |  |  |  |  |  |  |  |
| Expense change |  |  | 0.0158 |  |  |  |  |  |  |
|  |  |  | (0.0124) |  |  |  |  |  |  |
| Saving change |  |  |  | 0.0664*** |  |  |  |  |  |
|  |  |  |  | (0.0138) |  |  |  |  |  |
| Enjoying more free time |  |  |  |  | 0.1367*** |  |  |  |  |
|  |  |  |  |  | (0.0297) |  |  |  |  |
| Less pollution |  |  |  |  |  | 0.1423*** |  |  |  |
|  |  |  |  |  |  | (0.0301) |  |  |  |
| Trouble sleeping |  |  |  |  |  |  | 0.0065 |  |  |
|  |  |  |  |  |  |  | (0.0283) |  |  |
| Trouble sleeping |  |  |  |  |  |  |  | -0.0615* |  |
|  |  |  |  |  |  |  |  | (0.0336) |  |
| Increased conflicts with other people |  |  |  |  |  |  |  |  | -0.2356*** |
|  |  |  |  |  |  |  |  | (0.0530) |
| Control variables | Yes | Yes | Yes | Yes | Yes | Yes | Yes | Yes | Yes |
| Constant | 3.7180*** | 3.7386*** | 3.6596*** | 3.5185*** | 3.6207*** | 3.6328*** | 3.6967*** | 3.7263*** | 3.7394*** |
|  | (0.0676) | (0.0679) | (0.0753) | (0.0766) | (0.0689) | (0.0685) | (0.0701) | (0.0690) | (0.0682) |
| Observations | 5,950 | 5,950 | 5,950 | 5,950 | 5,950 | 5,950 | 5,950 | 5,950 | 5,950 |
| R-squared | 0.170 | 0.173 | 0.169 | 0.172 | 0.171 | 0.172 | 0.168 | 0.169 | 0.172 |
| Note: The control variables include age groups, gender, urban dummy, country dummies. Robust standard errors in parentheses  *** p<0.01, ** p<0.05, * p<0.1 | | | | | | | | | |

# Appendix B: Robustness Checks

We briefly discuss next several additional robustness checks. First, there may be a multiple testing problem with the eight outcome variables. Thus, in addition to the p-value of the estimate, which is the false positive rate among all the results, as a robustness check, we compute the q-values which constitute the false positive rate among significant results (i.e., the false discovery rate). The p-values and q-values of the coefficients of the poorest and the second poorest quintiles for these outcomes, shown in Figure B.1 in Appendix B, suggests that the most significant p-values remain significant using the q-values.[[1]](#footnote-1) Second, since the dependent variable is a categorical variable, we also estimate Equation (1) with the alternative ordered logit model as a robustness check. The estimation results, expressed in odd ratios in Table B.1, Appendix B, are qualitatively similar.[[2]](#footnote-2)

Third, we use an alternative definition of the poorer income quintiles, where we separately consider the poorest quintiles, the two poorest quintiles, the three poorest quintiles, the four poorer quintiles, and their interaction terms with the Gini index. Estimates, shown in Table B.2, Appendix B show that the interaction terms for the three poorest quintiles or the four poorer quintiles are strongly statistically significant for belief in the approach of the government in response to the pandemic (columns 3 and 4), and to a weaker extent for the PCA index variable (columns 7 and 8).

Fourth, instead of using the Gini index to measure inequality, we use two ratios of the 90th/10th and 80th/20th income percentiles as robustness checks (since the Solt database does not provide these indicators, we use data from the World Bank World Development Indicators). These ratios focus on the differences between certain income percentiles, so are less general than the Gini index that focuses on the whole income distribution. The results are statistically weaker for the regressions with inequality. Nevertheless, they generally indicate that individuals that support government responses less include those in the second poorest quintile who live in countries with more inequality (Table B.3, Appendix B).

Finally, a limitation of the country fixed-effects model (equation (1)) is that it cannot include country time-invariant characteristics such as GDP per capita, unemployment, and education levels. We estimate a pooled OLS model where we control for log of GDP per capita, unemployment rate, and the proportion of people aged 25 and older with secondary education achievement. These variables are for 2019 and are taken from the World Bank’s World Development Indicators database. The estimation results, shown in Table B.4, Appendix B, are qualitatively similar.

## Table B.1. Ordered Logit Regressions: Odds Ratio

|  | (1) | (2) | (3) | (4) | (5) | (6) | (7) | (8) |
| --- | --- | --- | --- | --- | --- | --- | --- | --- |
| Explanatory variables | Believe in the government in response to the pandemic | Believe in shutting down schools | Believe in shutting down public transport | Believe in shutting down non-essential businesses | Believe in limiting mobility outside home | Believe in forbidding mass gatherings | Believe in introducing fines for citizens that don't respect public safety measures | Believe in requiring masks to be worn outside by everyone |
| Poorest quintile | 0.7177*** | 1.0818 | 0.8743* | 0.9602 | 0.8752* | 0.7377*** | 0.9622 | 0.8942 |
|  | (0.0564) | (0.0844) | (0.0684) | (0.0760) | (0.0687) | (0.0616) | (0.0767) | (0.0721) |
| Second poorest quintile | 0.7602*** | 0.9720 | 0.8333** | 0.9053 | 0.8877 | 0.7407*** | 1.0318 | 0.8647* |
|  | (0.0592) | (0.0748) | (0.0649) | (0.0713) | (0.0683) | (0.0611) | (0.0793) | (0.0685) |
| Middle quintile | 0.7654*** | 1.0972 | 0.9631 | 1.0574 | 1.0653 | 0.8732* | 1.0776 | 1.0792 |
|  | (0.0594) | (0.0802) | (0.0700) | (0.0782) | (0.0786) | (0.0697) | (0.0780) | (0.0827) |
| Second Richest quintile | 0.8356** | 1.0452 | 1.0260 | 1.0594 | 1.0527 | 0.9218 | 1.0580 | 0.8825* |
|  | (0.0632) | (0.0737) | (0.0723) | (0.0757) | (0.0770) | (0.0722) | (0.0745) | (0.0650) |
| Richest quintile |  | Reference |  |  |  |  |  |  |
| Constant cut1 | 0.0527*** | 0.0330*** | 0.0331*** | 0.0379*** | 0.0487*** | 0.0332*** | 0.1037*** | 0.0548*** |
|  | (0.0067) | (0.0044) | (0.0044) | (0.0051) | (0.0063) | (0.0047) | (0.0130) | (0.0069) |
| Constant cut2 | 0.1541*** | 0.1353*** | 0.1033*** | 0.1352*** | 0.1655*** | 0.0804*** | 0.2738*** | 0.1575*** |
|  | (0.0184) | (0.0165) | (0.0129) | (0.0167) | (0.0195) | (0.0106) | (0.0327) | (0.0189) |
| Constant cut3 | 0.5483*** | 0.3991*** | 0.3543*** | 0.5038*** | 0.5664*** | 0.2277*** | 0.8781 | 0.4955*** |
|  | (0.0627) | (0.0472) | (0.0427) | (0.0597) | (0.0647) | (0.0287) | (0.1028) | (0.0577) |
| Constant cut4 | 2.7862*** | 1.7983*** | 1.5146*** | 2.1510*** | 2.4672*** | 0.8030* | 3.0735*** | 1.7194*** |
|  | (0.3195) | (0.2105) | (0.1805) | (0.2539) | (0.2822) | (0.0993) | (0.3630) | (0.1996) |
| Control variables | Yes | Yes | Yes | Yes | Yes | Yes | Yes | Yes |
| Observations | 5,950 | 5,950 | 5,950 | 5,950 | 5,950 | 5,950 | 5,950 | 5,950 |
| R-squared | 0.0721 | 0.0258 | 0.0291 | 0.0344 | 0.0201 | 0.0130 | 0.0129 | 0.0572 |
| Note: This table reports odds ratio of income quintiles in ordered logit regression of the responses to different government’s measures to COVID-19. The control variables include age groups, gender, urban dummy, country dummies, and the rate of COVID-19 cases. The richest income quintile is the reference group. Robust standard errors in parentheses. *** p<0.01, ** p<0.05, * p<0.1. | | | | | | | | |

## Table B2. OLS regressions with interactions

| Explanatory variables | (1) | (2) | (3) | (4) | (5) | (6) | (7) | (8) |
| --- | --- | --- | --- | --- | --- | --- | --- | --- |
| Believe in the approach of the government in response to the pandemic | | | | PCA Index of the variables 'believe in different policies' | | | |
| Model 1 | Model 2 | Model 3 | Model 4 | Model 1 | Model 2 | Model 3 | Model 4 |
| Poorest quintile | -0.4164* |  |  |  | -0.0414 |  |  |  |
|  | (0.2192) |  |  |  | (0.2461) |  |  |  |
| Poorest quintile * Gini index | 0.0098 |  |  |  | -0.0012 |  |  |  |
|  | (0.0063) |  |  |  | (0.0071) |  |  |  |
| Two poorest quintiles |  | 0.1341 |  |  |  | -0.0187 |  |  |
|  |  | (0.1819) |  |  |  | (0.1963) |  |  |
| Two poorest quintiles * Gini index |  | -0.0058 |  |  |  | -0.0025 |  |  |
|  |  | (0.0052) |  |  |  | (0.0057) |  |  |
| Three poorest quintiles |  |  | 0.4000** |  |  |  | 0.5192*** |  |
|  |  |  | (0.1852) |  |  |  | (0.1959) |  |
| Three poorest quintiles * Gini index |  |  | -0.0144*** |  |  |  | -0.0169*** |  |
|  |  |  | (0.0053) |  |  |  | (0.0057) |  |
| Four poorer quintiles |  |  |  | 0.6253*** |  |  |  | 0.3678 |
|  |  |  |  | (0.2286) |  |  |  | (0.2475) |
| Four poorer quintiles * Gini index |  |  |  | -0.0214*** |  |  |  | -0.0118 |
|  |  |  |  | (0.0065) |  |  |  | (0.0072) |
| Control variables | Yes | Yes | Yes | Yes | Yes | Yes | Yes | Yes |
| Constant | 3.5876*** | 3.6062*** | 3.6655*** | 3.7296*** | -0.0420 | -0.0021 | 0.0227 | 0.0111 |
|  | (0.0604) | (0.0603) | (0.0622) | (0.0680) | (0.0560) | (0.0563) | (0.0582) | (0.0646) |
| Observations | 5,950 | 6,089 | 6,089 | 6,089 | 5,950 | 6,089 | 6,089 | 6,089 |
| R-squared | 0.167 | 0.167 | 0.169 | 0.169 | 0.059 | 0.061 | 0.061 | 0.059 |
| Note: This table reports OLS regression of the responses to government’s measures to COVID-19. The control variables include age groups, gender, urban dummy, country dummies, and COVID-19 infection rates. The richest income quintile is the reference group. Gini index is from the Solt database. Robust standard errors in parentheses.  *** p<0.01, ** p<0.05, * p<0.1 | | | | | | | | |

## Table B.3. OLS regressions with interactions between income quintiles and ratio of income percentiles

| Explanatory variables | (1) | (2) | (3) | (4) |
| --- | --- | --- | --- | --- |
| Believe in the approach of the government in response to the pandemic | Index of the variables 'believe to different policies' | Believe in the approach of the government in response to the pandemic | Index of the variables 'believe to different policies' |
| Poorest quintile | 0.0265 | 0.0875 | 0.1143 | 0.1400 |
|  | (0.1736) | (0.1623) | (0.2387) | (0.2214) |
| Second poorest quintile | 0.2547 | 0.1612 | 0.5956** | 0.3652* |
|  | (0.1764) | (0.1619) | (0.2439) | (0.2215) |
| Middle quintile | 0.1072 | 0.2485 | 0.4152* | 0.4572** |
|  | (0.1748) | (0.1526) | (0.2414) | (0.2103) |
| Second Richest quintile | 0.1533 | 0.0968 | 0.2934 | 0.1183 |
|  | (0.1686) | (0.1462) | (0.2340) | (0.2002) |
| Richest quintile | *Reference* |  |  |  |
| Poorest quintile * Ratio 90th/10th | -0.0175 | -0.0158 |  |  |
|  | (0.0147) | (0.0136) |  |  |
| Second poorest quintile * Ratio 90th/10th | -0.0329** | -0.0216 |  |  |
|  | (0.0151) | (0.0137) |  |  |
| Middle quintile* Ratio 90th/10th | -0.0214 | -0.0194 |  |  |
|  | (0.0148) | (0.0127) |  |  |
| Second Richest quintile * Ratio 90th/10th | -0.0205 | -0.0075 |  |  |
|  | (0.0141) | (0.0121) |  |  |
| Poorest quintile * Ratio 80th/20th |  |  | -0.0440 | -0.0358 |
|  |  |  | (0.0356) | (0.0331) |
| Second poorest quintile * Ratio 80th/20th |  |  | -0.1096*** | -0.0689** |
|  |  |  | (0.0366) | (0.0334) |
| Middle quintile * Ratio 80th/20th |  |  | -0.0843** | -0.0659** |
|  |  |  | (0.0362) | (0.0315) |
| Second Richest quintile * Ratio 80th/20th |  |  | -0.0575* | -0.0166 |
|  |  |  | (0.0346) | (0.0297) |
| Control variables | Yes | Yes | Yes | Yes |
| Constant | 3.8278*** | 0.0689 | 3.8675*** | 0.0855 |
|  | (0.0959) | (0.0852) | (0.0937) | (0.0849) |
| Observations | 5,950 | 5,950 | 5,950 | 5,950 |
| R-squared | 0.169 | 0.061 | 0.170 | 0.062 |
| Note: This table reports OLS regression of the responses to government’s measures to COVID-19. The control variables include age groups, gender, urban dummy, country dummies, and COVID-19 infection rates. The richest income quintile is the reference group. The income ratio is from the World Bank’s World Development Indicators. Robust standard errors in parentheses.  *** p<0.01, ** p<0.05, * p<0.1 | | | | |

## Table B4. OLS regressions of agreement with government’s responses to the COVID-19 pandemic with controlling for country-level observable variables

| Explanatory variables | (1) | (2) | (3) | (4) | (5) | (6) | (7) | (8) |
| --- | --- | --- | --- | --- | --- | --- | --- | --- |
| Overall government in response to the pandemic | Shutting down schools | Shutting down public transport | Shutting down non-essential businesses | Limiting mobility outside home | Forbidding mass gatherings | Introducing fines for citizens that don't respect public safety measures | Requiring masks to be worn outside by everyone |
| Poorest quintile (Q1) | -0.1971*** | 0.0235 | -0.1203** | -0.0489 | -0.1124** | -0.1963*** | -0.0780 | -0.0285 |
|  | (0.0454) | (0.0482) | (0.0481) | (0.0475) | (0.0472) | (0.0455) | (0.0518) | (0.0520) |
| Second poorest quintile (Q2) | -0.1497*** | -0.0191 | -0.1510*** | -0.0719 | -0.0875* | -0.1615*** | -0.0075 | -0.0323 |
|  | (0.0453) | (0.0479) | (0.0485) | (0.0475) | (0.0468) | (0.0446) | (0.0503) | (0.0513) |
| Middle quintile (Q3) | -0.1646*** | 0.0716 | -0.0420 | 0.0328 | 0.0256 | -0.0670 | 0.0394 | 0.1189** |
|  | (0.0448) | (0.0452) | (0.0452) | (0.0448) | (0.0443) | (0.0415) | (0.0477) | (0.0488) |
| Second richest quintile (Q4) | -0.1014** | 0.0381 | 0.0067 | 0.0430 | 0.0176 | -0.0400 | 0.0345 | -0.0265 |
|  | (0.0440) | (0.0443) | (0.0435) | (0.0433) | (0.0439) | (0.0408) | (0.0465) | (0.0484) |
| Richest quintile (Q5) | Reference |  |  |  |  |  |  |  |
| The rate of COVID-19 | 0.0010 | 0.0072** | 0.0044 | 0.0049 | 0.0054 | 0.0039 | 0.0101*** | 0.0147*** |
|  | (0.0035) | (0.0033) | (0.0033) | (0.0033) | (0.0033) | (0.0031) | (0.0039) | (0.0036) |
| Female respondents (female=1) | -0.0446 | -0.1265*** | -0.1470*** | -0.1701*** | -0.1662*** | -0.1717*** | -0.1371*** | -0.1917*** |
|  | (0.0281) | (0.0290) | (0.0293) | (0.0287) | (0.0285) | (0.0274) | (0.0309) | (0.0311) |
| Age group (18 to 25) | Reference |  |  |  |  |  |  |  |
| Age group (26 to 35) | 0.1262** | 0.1465*** | 0.1079* | 0.1829*** | 0.1870*** | 0.1533*** | 0.1632*** | 0.0628 |
|  | (0.0493) | (0.0568) | (0.0571) | (0.0552) | (0.0558) | (0.0558) | (0.0589) | (0.0589) |
| Age group (36 to 45) | 0.1085** | 0.1500*** | 0.1399** | 0.1044* | 0.1161** | 0.0811 | 0.0359 | 0.0128 |
|  | (0.0495) | (0.0554) | (0.0556) | (0.0546) | (0.0547) | (0.0557) | (0.0582) | (0.0577) |
| Age group (46 to 55) | 0.1369*** | 0.2030*** | 0.1271** | 0.1329** | 0.1911*** | 0.1255** | 0.0306 | -0.0995* |
|  | (0.0502) | (0.0559) | (0.0570) | (0.0556) | (0.0553) | (0.0554) | (0.0592) | (0.0591) |
| Age group (56 to 65) | 0.2247*** | 0.2180*** | 0.1444** | 0.1622*** | 0.3045*** | 0.2603*** | 0.1539*** | -0.0311 |
|  | (0.0527) | (0.0568) | (0.0582) | (0.0564) | (0.0560) | (0.0555) | (0.0595) | (0.0608) |
| Age group (66 to 75) | 0.3192*** | 0.2647*** | 0.2122*** | 0.1969*** | 0.3231*** | 0.3613*** | 0.1869*** | 0.1905*** |
|  | (0.0560) | (0.0586) | (0.0593) | (0.0584) | (0.0583) | (0.0562) | (0.0628) | (0.0625) |
| Age group (Above 75) | 0.2758*** | 0.2164*** | 0.1315* | 0.1504* | 0.2328*** | 0.2642*** | 0.1654* | 0.0817 |
|  | (0.0773) | (0.0803) | (0.0799) | (0.0798) | (0.0781) | (0.0755) | (0.0867) | (0.0861) |
| Urban people (yes=1) | -0.0442 | 0.0049 | -0.0738** | -0.0046 | 0.0011 | -0.0585** | 0.0461 | 0.1584*** |
|  | (0.0304) | (0.0309) | (0.0312) | (0.0303) | (0.0305) | (0.0290) | (0.0330) | (0.0331) |
| Log of GDP per capita | -0.7253*** | 0.1969* | 1.9997*** | 1.9252*** | 1.3693*** | -0.3733*** | -0.9637*** | -1.2595*** |
| (0.1284) | (0.1167) | (0.1258) | (0.1194) | (0.1227) | (0.1123) | (0.1276) | (0.1146) |
| Gini index (in percent) | 0.0842*** | 0.0323*** | -0.0082* | -0.0099** | -0.0186*** | 0.0147*** | 0.0173*** | 0.0273*** |
|  | (0.0041) | (0.0044) | (0.0044) | (0.0045) | (0.0043) | (0.0043) | (0.0048) | (0.0046) |
| Unemployment rate (in percent) | 0.0348*** | 0.0492*** | -0.0775*** | -0.0816*** | -0.0578*** | 0.0594*** | 0.0943*** | 0.0923*** |
| (0.0094) | (0.0091) | (0.0094) | (0.0092) | (0.0093) | (0.0087) | (0.0098) | (0.0093) |
| Share of people aged 25+ with secondary education achievement | 0.0101*** | -0.0044* | -0.0441*** | -0.0454*** | -0.0326*** | 0.0077*** | 0.0165*** | 0.0187*** |
| (0.0027) | (0.0025) | (0.0027) | (0.0025) | (0.0026) | (0.0024) | (0.0027) | (0.0024) |
| Constant | 7.6328*** | 0.5391 | -13.6026*** | -12.7537*** | -7.5546*** | 6.8697*** | 11.6390*** | 14.3063*** |
|  | (1.1033) | (0.9986) | (1.0713) | (1.0196) | (1.0481) | (0.9561) | (1.1027) | (0.9867) |
| Observations | 5,950 | 5,950 | 5,950 | 5,950 | 5,950 | 5,950 | 5,950 | 5,950 |
| R-squared | 0.157 | 0.057 | 0.077 | 0.087 | 0.049 | 0.032 | 0.039 | 0.087 |
| Note: The control variables include age groups, gender, urban dummy, and COVID-19 infection rates. The richest income quintile is the reference group.  Heteroskedasticity-robust standard errors. Log of GDP per capita, unemployment rate, and the proportion of people aged 25 and older with secondary education achievement are for 2019 and are taken from the World Bank’s World Development Indicators database.  *** p<0.01, ** p<0.05, * p<0.1 | | | | | | | | |

## Figure B.1. P-value and Q-value of the effect of the poorest and second poorest income quintile on the agreement to the government’s response to the COVID-19 pandemic

|  |
| --- |
|  |
|  |
|  |

**1 Hale, Thomas, Noam Angrist, Emily Cameron-Blake, Laura Hallas, Beatriz Kira, Saptarshi Majumdar, Anna Petherick, Toby Phillips, Helen Tatlow, Samuel Webster (2020). Oxford COVID-19 Government Response Tracker, Blavatnik School of Government. <https://www.bsg.ox.ac.uk/research/research-projects/coronavirus-government-response-tracker>**

**2 Cheng, C., Barceló, J., Hartnett, A. S., Kubinec, R., & Messerschmidt, L. (2020). COVID-19 government response event dataset (CoronaNet v. 1.0). Nature human behaviour, 4(7), 756-768.**

**3 Holtz, D., Zhao, M., Benzell, S. G., Cao, C. Y., Rahimian, M. A., Yang, J., ... & Aral, S. (2020). Interdependence and the cost of uncoordinated responses to COVID-19. Proceedings of the National Academy of Sciences, 117(33), 19837-19843.**

**4 Trevisan, M., Le, L. C., & Le, A. V. (2020). The COVID-19 Pandemic: A View from Vietnam. American Journal of Public Health, 110(8), 1152–1153.**

**5 Shokoohi, M., Osooli, M., & Stranges, S. (2020). COVID-19 pandemic: what can the West learn from the East? International Journal of Health Policy and Management, 9(10), 436.**

**6 Meltzer, A.H. and Richard, S.F., 1981. A rational theory of the size of government. Journal of Political Economy, 89(5), 914-927.**

**7 Haggard, S., Kaufman, R.R. and Long, J.D., 2013. Income, occupation, and preferences for redistribution in the developing world. Studies in Comparative International Development, 48(2), pp.113-140.**

**8 Pontusson, J. and Rueda, D., 2010. The politics of inequality: Voter mobilization and left parties in advanced industrial states. Comparative Political Studies, 43(6), pp.675-705.**

**9 Boix, C., 2003. Democracy and redistribution. Cambridge University Press.**

**10 Acemoglu, D., Johnson, S. and Robinson, J.A., 2005. Institutions as a fundamental cause of long-run growth. Handbook of Economic Growth, 1, pp.385-472.**

**11 Moene, K.O. and Wallerstein, M., 2002. Earnings inequality and welfare spending: A disaggregated analysis. World Politics, 55, 485-516.**

**12 Anderson, L.R., Mellor, J.M. and Milyo, J., 2008. Inequality and public good provision: An experimental analysis. Journal of Socio-Economics, 37(3), pp.1010-1028.**

**13 Leigh, A., Jencks, C. and Smeeding, T.M., 2009. Health and economic inequality. The Oxford Handbook of Economic Inequality, pp.384-405.**

**14 Gustavsson, M. and Jordahl, H., 2008. Inequality and trust in Sweden: Some inequalities are more harmful than others. Journal of Public Economics, 92(1-2), pp.348-365.**

**15 Elgar, F.J., 2010. Income inequality, trust, and population health in 33 countries. American Journal of Public Health, 100(11), pp.2311-2315.**

**16 Barone, G. and Mocetti, S., 2016. Inequality and trust: new evidence from panel data. Economic Inquiry, 54(2), pp.794-809.**

**17 Uslaner, E.M. and Brown, M., 2005. Inequality, trust, and civic engagement. American Politics Research, 33(6), pp.868-894.**

**18 Obadare, E., 2005. A crisis of trust: history, politics, religion and the polio controversy in Northern Nigeria. Patterns of Prejudice, 39(3), 265-284.**

**19 Blair, R.A., Morse, B.S. and Tsai, L.L., 2017. Public health and public trust: Survey evidence from the Ebola Virus Disease epidemic in Liberia. Social Science & Medicine, 172, pp.89-97.**

**20 Arriola, L.R. and Grossman, A.N., 2020. Ethnic marginalization and (non) compliance in public health emergencies. < https://www.journals.uchicago.edu/doi/10.1086/710784>**

**21 Gourevitch, P., 1986. Politics in hard times: Comparative responses to international economic crises. Cornell University Press.**

**22 Kahler, M. and Lake, D.A. eds., 2013. Politics in the new hard times: The great recession in comparative perspective. Cornell University Press.**

**23 Zimmerman, F.J. and Carter, M.R., 2003. Asset smoothing, consumption smoothing and the reproduction of inequality under risk and subsistence constraints. Journal of Development Economics, 71(2), 233-260.**

**24 Kumhof, M., Rancière, R. and Winant, P., 2015. Inequality, leverage, and crises. American Economic Review, 105(3), 1217-45.**

**25 Cynamon, B. Z., & Fazzari, S. M. 2016. “Inequality, the Great Recession and slow recovery,” Cambridge Journal of Economics, 40(2), 373-399.**

**26 Parker 2002, Parker, R., 2002. The global HIV/AIDS pandemic, structural inequalities, and the politics of international health. American Journal of Public Health, 92(3), 343-347.**

**27 Kumar, S. and Quinn, S.C., 2012. Existing health inequalities in India: informing preparedness planning for an influenza pandemic. Health Policy and Planning, 27(6), pp.516-526.**

**28 Bosancianu, C.M., Dionne, K.Y., Hilbig, H., Humphreys, M., Sampada, K.C., Lieber, N. and Scacco, A., 2020. Political and social correlates of covid-19 mortality. SocArXiv, 16 June 2020. Web.**

**29 Mahler, D.G., Lakner, C., Aguilar, R.A.C. and Wu, H., 2020. Updated estimates of the impact of COVID-19 on global poverty. World Bank. < https://blogs.worldbank.org/opendata/updated-estimates-impact-covid-19-global-poverty>**

**30 Blau, F.D., Koebe, J. and Meyerhofer, P.A., 2020. Who are the Essential and Frontline Workers? (No. w27791). National Bureau of Economic Research.**

**31 Chetty, R., Friedman, J.N., Hendren, N. and Stepner, M., 2020. How did COVID-19 and stabilization policies affect spending and employment? A new real-time economic tracker based on private sector data (No. w27431). National Bureau of Economic Research.**

**32 Solt, F., 2019. The standardized world income inequality database, Version 8. Cambridge: Harvard Dataverse.**

**33 Imai, K., L. Keele, and D. Tingley. (2010a). A general approach to causal mediation analysis. Psychological Methods 15: 309–334.**

**34 Imai, K., L. Keele, and T. Yamamoto. (2010b). Identification, inference, and sensitivity analysis for causal mediation effects. Statistical Science 25: 51–71.**

**35 Dang, H. A. H., Huynh, T. L. D., & Nguyen, M. H. (2020). Does the COVID-19 Pandemic Disproportionately Affect the Poor? Evidence from a Six-Country Survey. IZA Discussion Paper No. 13352.**

**36 Bloom, D. E., Kuhn, M., & Prettner, K. (2020). Modern Infectious Diseases: Macroeconomic Impacts and Policy Responses. Journal of Economic Literature.**

1. The p-value is adjusted so that the chance of finding a random significant effect is reasonably small. The q-values are computed by Simes’ (1986) methods, using the ‘qqvalue’ command in Stata (Newson, 2011). [↑](#footnote-ref-1)
2. For example, the four poorer quintiles have lower odds of support for government responses than the richest quintiles, with their odds ranging from 0.28 to 0.23 lower for the three poorer quintiles, and 0.16 lower for the second richest quintile (column 1). [↑](#footnote-ref-2)
